# Supplementary material for: Deep learning enabled inorganic material generator
Source: Royal Society of Chemistry journal article supplement (doi:10.1039/d0cp03508d), 2020-01-01
Supplement: d0cp03508d1.pdf [file d0cp03508d1.pdf]

# Supplementary Information: Deep Learning Enabled Inorganic Material Generator

Yashaswi Pathak,<sup>†,¶</sup> Karandeep Singh Juneja,<sup>†,¶</sup> Girish Varma,<sup>†</sup> Masahiro Ehara,<sup>‡</sup>  
and U Deva Priyakumar<sup>\*,†</sup>

<sup>†</sup>*International Institute of Information Technology, Hyderabad 500 032, India*

<sup>‡</sup>*Research Center for Computational Science, Institute for Molecular Science, Okazaki  
444-8585, Japan*

<sup>¶</sup>*Authors contributed equally*

E-mail: deva@iiit.ac.in

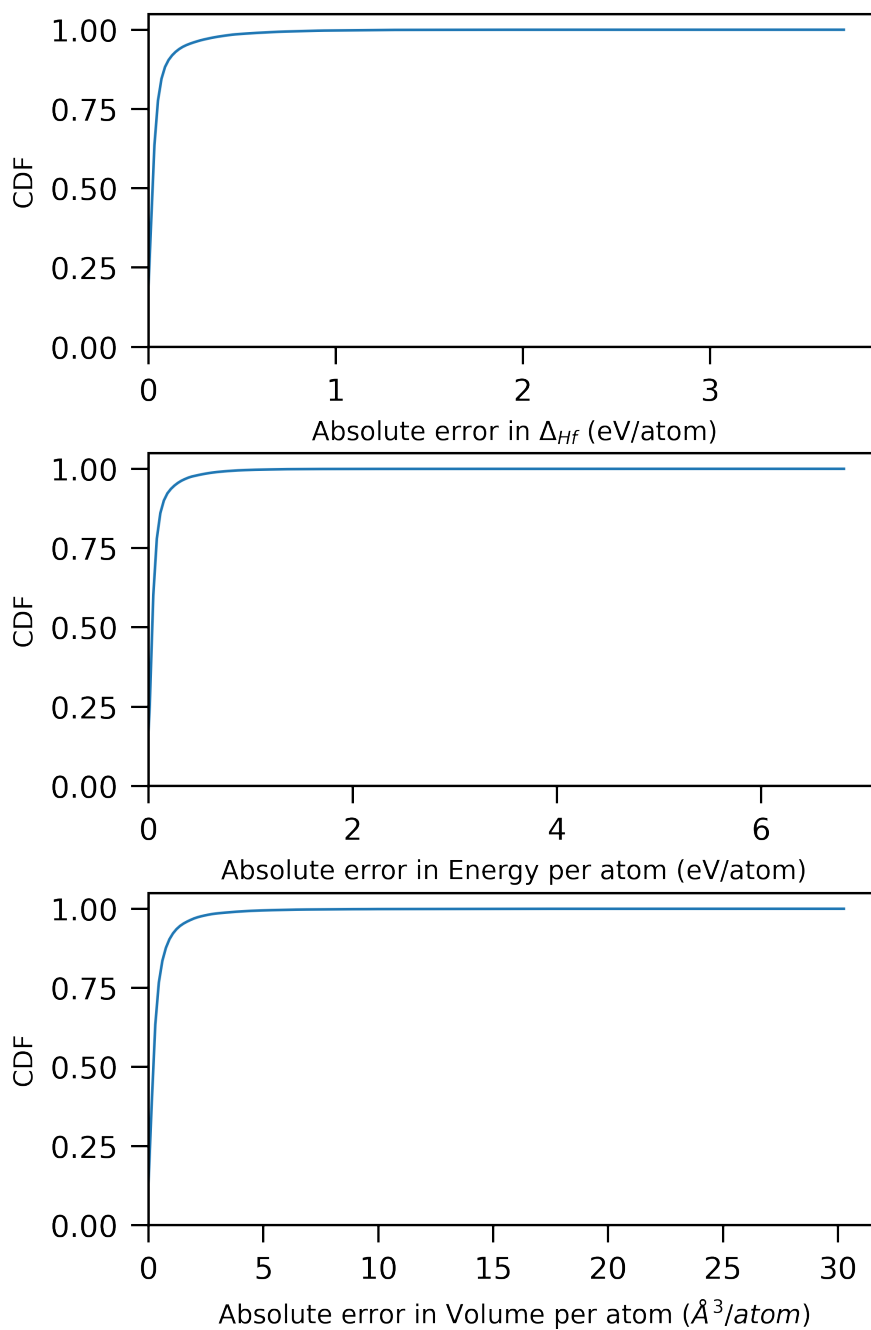

Figure S1: The cumulative distribution function of the absolute error in prediction for enthalpy of formation, energy per atom and volume per atom within the applicability range.
